# Supplementary material for: Controlling Nuclear NF-κB Dynamics by β-TrCP—Insights from a Computational Model
Source: MDPI journal article supplement (doi:10.3390/biomedicines7020040), 2019-05-27
Supplement: s1 [file s1]

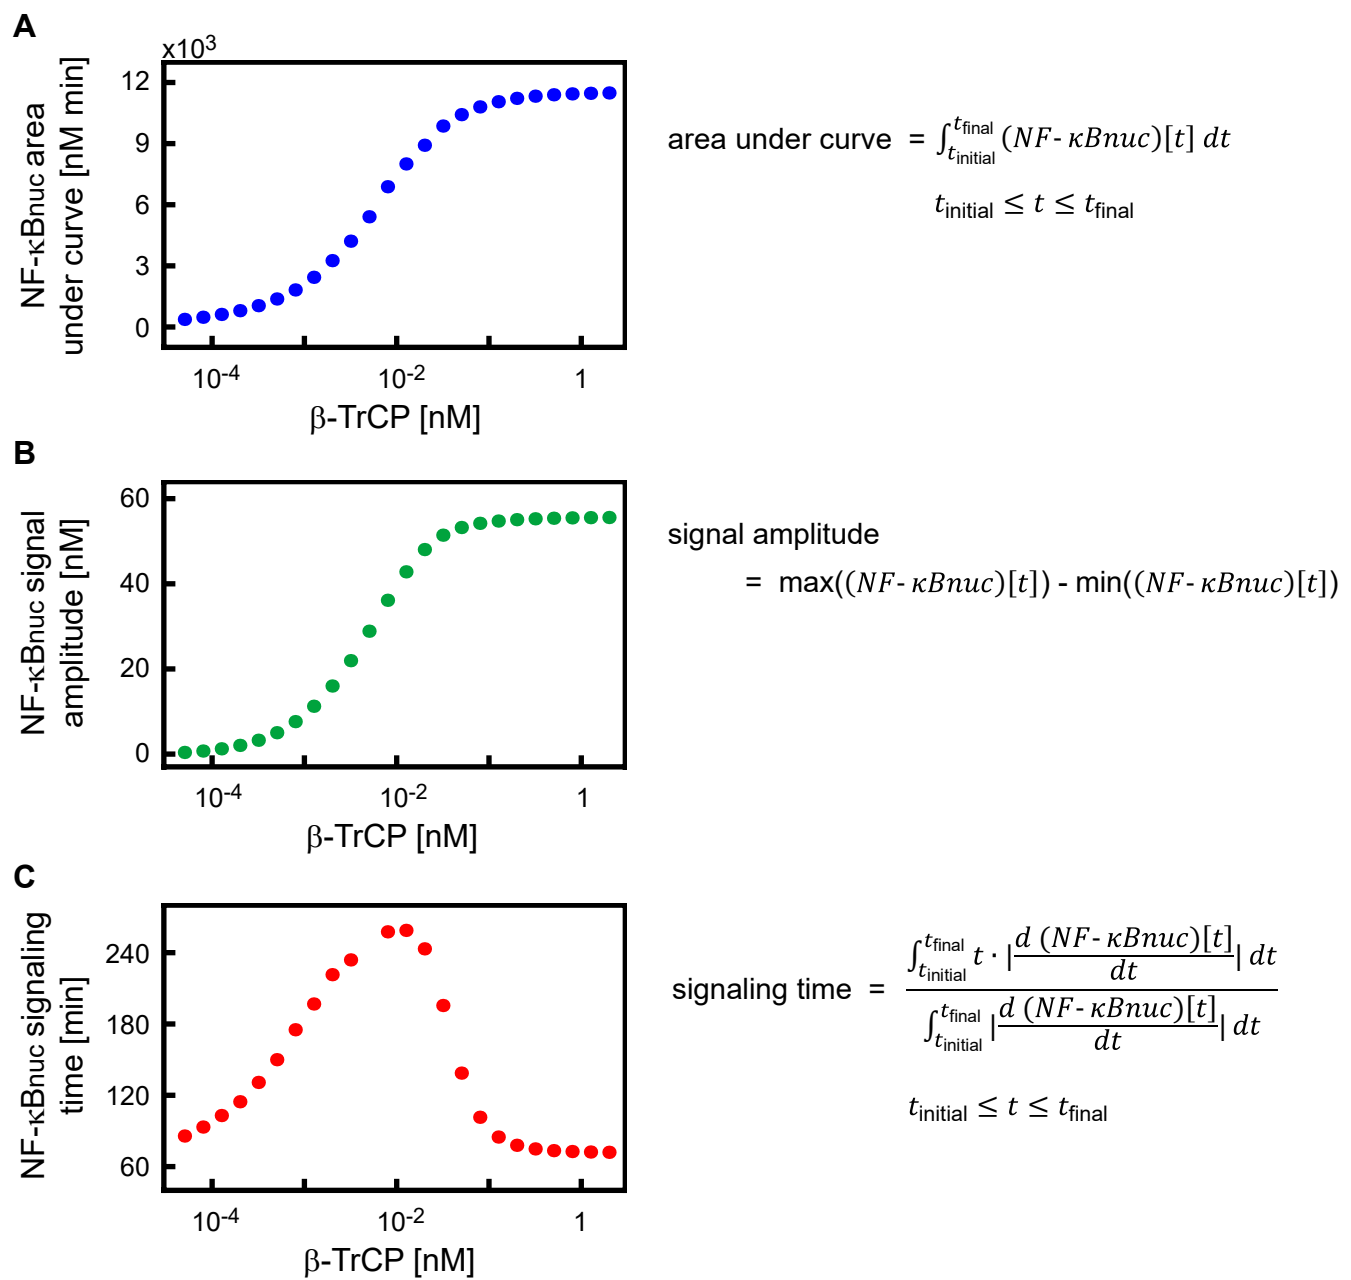

**Figure S1: Influence of  $\beta$ -TrCP abundance on additional established measures of the transient dynamics of nuclear NF- $\kappa$ B upon TNF stimulation.**

Dependence of the area under curve (A), signal amplitude (B) and signaling time (C) of nuclear NF- $\kappa$ B upon TNF stimulation assuming  $\beta$ -TrCP concentrations between  $5 \cdot 10^{-5}$  nM and 2 nM. The respective definitions of the measures are shown on the right side of each panel. Signal amplitude can be interpreted as a measure of the magnitude of NF- $\kappa$ B activation, while signaling time characterises temporal aspects of the NF- $\kappa$ B response to TNF stimulation. The area under curve is a combination of magnitude and temporal aspects; it is referred to as time-integrated activity or accumulative response.
